# Supplementary material for: Comparison of ARIMA and Random Forest time series models for prediction of avian influenza H5N1 outbreaks
Source: Springer Nature journal article supplement (doi:10.1186/1471-2105-15-276), 2014-08-13

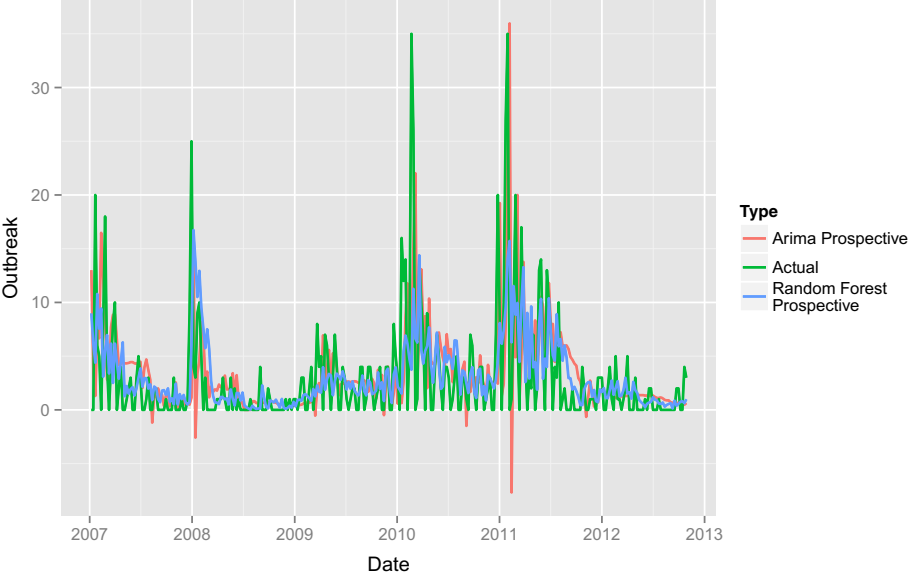

Supplement: 12859_2012_6550_MOESM3_ESM.pdf [file 12859_2012_6550_MOESM3_ESM.pdf]
